# Supplementary material for: Non-invasive MR imaging of human brain lymphatic networks with connections to cervical lymph nodes
Source: PubMed Central journal article supplement (PMC8752739; doi:10.1038/s41467-021-27887-0), 2022-01-11
Supplement: 41467_2021_27887_MOESM1_ESM.pdf [file 41467_2021_27887_MOESM1_ESM.pdf]

Supplementary Figures

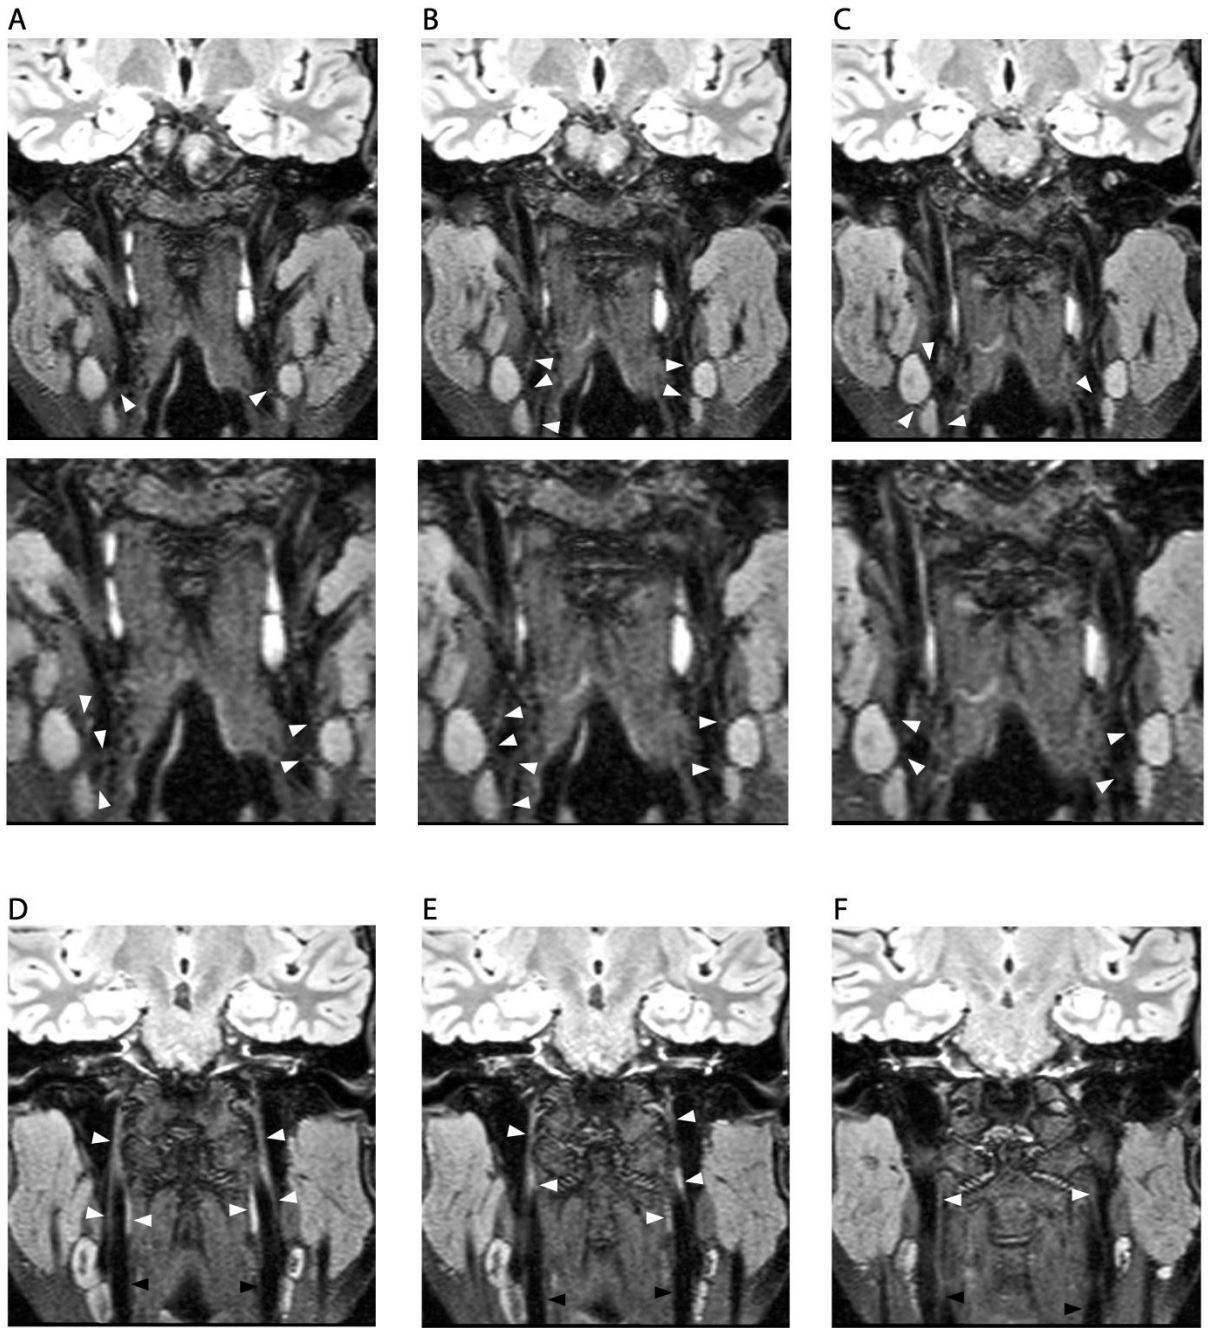

**Supplementary Fig. 1. 22-year-old female subject.** Sequential coronal FLAIR images depict connections between lymph nodes and structures in the vascular space including the wall of the internal carotid artery, the wall of the jugular vein, and the cervical cranial nerves (arrowheads). Additionally, coronal images (D-F) reveal attenuation of fluid drainage channels below the cervical lymph nodes along the vessels and cranial nerves (arrowheads).

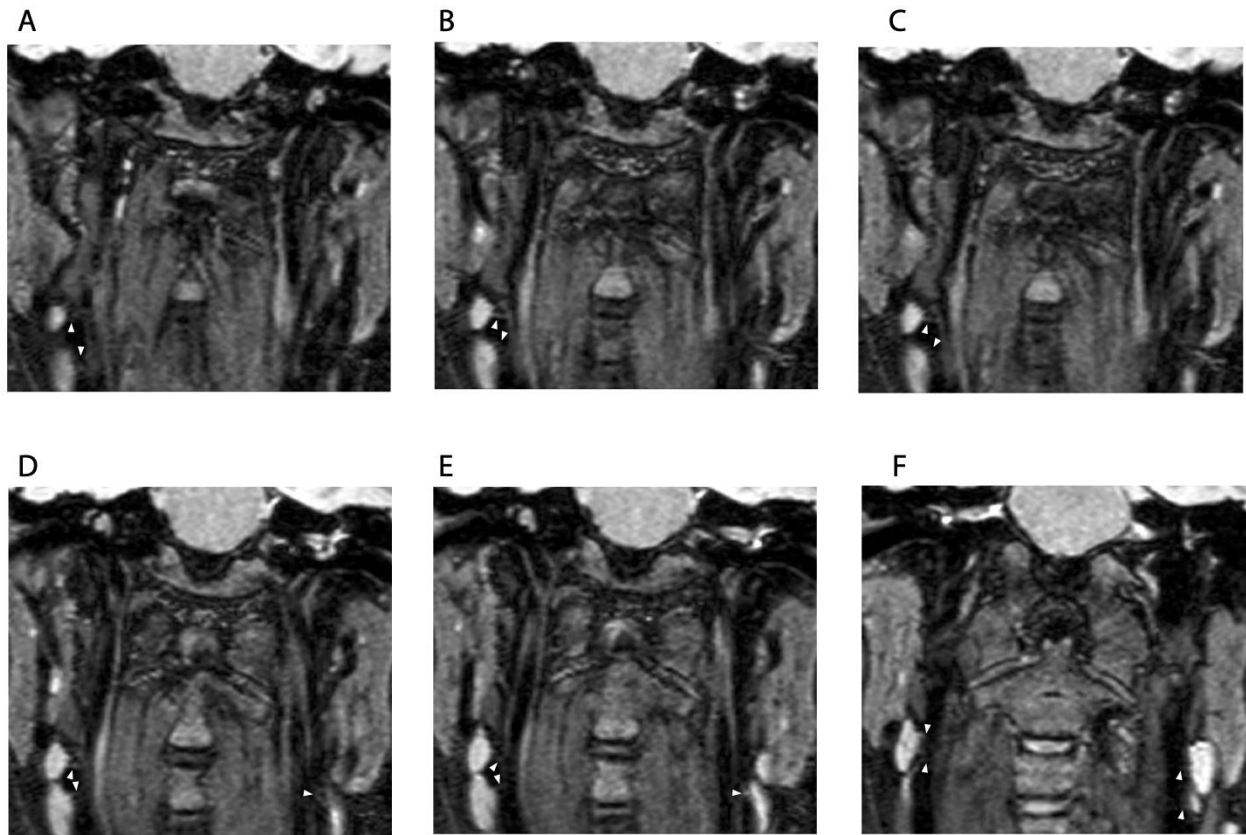

**Supplementary Fig. 2. 17-year-old male subject.** Sequential coronal FLAIR images depict connections between the lymph nodes and structures in the vascular space including the wall of the internal carotid artery, jugular vein and the cervical cranial nerves (arrowheads).

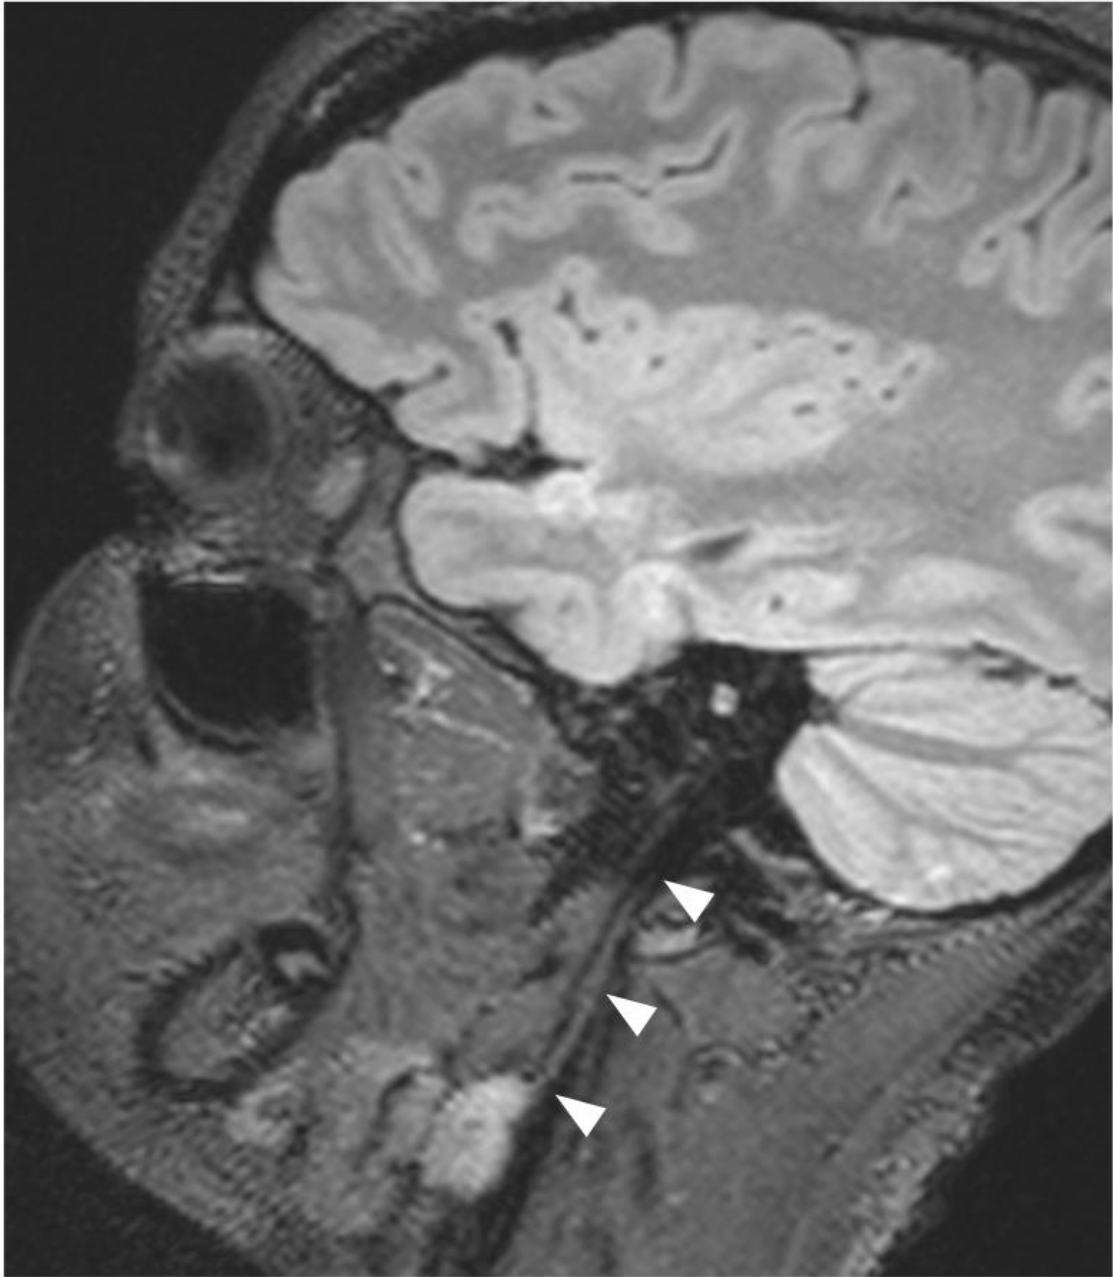

**Supplementary Fig. 3. 20-year-old female subject.** Sagittal oblique FLAIR images show direct communication between the cervical cranial nerves and vascular deep cervical lymph nodes (arrowheads).

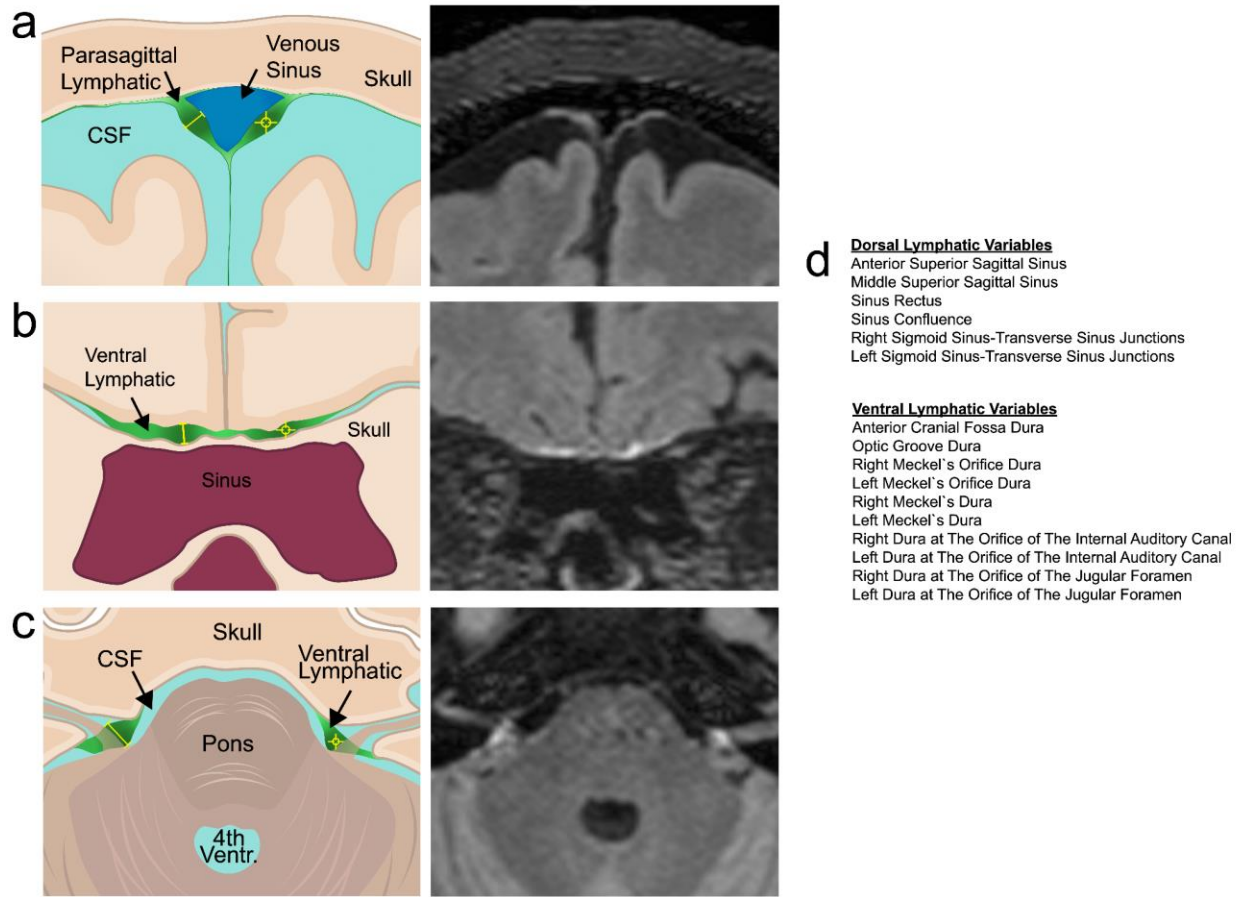

**Supplementary Fig. 4. Schematic representation of our measurement technique.** Corresponding MR images from the mid portion of the superior sagittal sinus (a), anterior cranial fossa dura (b), and dura at the level of the internal auditory canals (c). This list includes all dorsal and ventral variables that could be measured in all subjects (d).

Supplementary Tables

| Phantom Number | Albumin Concentration (mg/dl) | TI 1400 SI (Mean $\pm$ SD) |
|----------------|-------------------------------|----------------------------|
| 1              | ddH <sub>2</sub> O            | 25.7 $\pm$ 3.4             |
| 2              | 7.5                           | 27.6 $\pm$ 3.5             |
| 3              | 15                            | 32.8 $\pm$ 4.8             |
| 4              | 30                            | 22.7 $\pm$ 5.5             |
| 5              | 60                            | 15.6 $\pm$ 4.8             |
| 6              | 120                           | 16.6 $\pm$ 6.0             |
| 7              | 240                           | 19.3 $\pm$ 2.7             |
| 8              | 500                           | 32.2 $\pm$ 1.8             |
| 9              | 1000                          | 50.0 $\pm$ 3.8             |
| 10             | 2000                          | 76.2 $\pm$ 2.5             |
|                | Dural Lymphatic Signal        | 103.1 $\pm$ 16.0           |
| 11             | 4000                          | 105.8 $\pm$ 2.4            |

**Supplementary Table 1. SI values measured from solutions of different albumin concentrations at TI 1400 ms.**

| Anatomical Structures | TI 1800<br>SI (Mean ± SD) |
|-----------------------|---------------------------|
| Carotid Artery        | 11.3 ± 2.3                |
| Dural Venous Sinus    | 13.0 ± 1.6                |
| Cerebrospinal Fluid   | 14.2 ± 2.1                |
| Neck Muscles          | 64.6 ± 3.6                |
| White Matter          | 97.3 ± 3.8                |
| Grey Matter           | 109.4 ± 3.1               |
| Dural Lymphatic       | 114.2 ± 6.0               |
| Lymph Nodes           | 170.9 ± 10.3              |

**Supplementary Table 2. Mean signal intensity measurements from key structures in the head and neck regions of healthy subjects.**

|                                                      | Signal Intensity (units) | Signal Intensity Min-Max (units) | Thickness (mm) | Thickness Min-Max (mm) |
|------------------------------------------------------|--------------------------|----------------------------------|----------------|------------------------|
| Sagittal Sinus Anterior                              | 132±23                   | 59–207                           | 2.2±0.6        | 0.7–3.7                |
| Sagittal Sinus Middle                                | 158±23                   | 97–201                           | 3.9±1.1        | 2.5–7.0                |
| Sagittal Sinus Posterior                             | 98±31                    | 24–180                           | 1.5±0.5        | 0.9–4.1                |
| Sinus Rectus                                         | 119±31                   | 32–219                           | 1.3±0.5        | 0.6–3.4                |
| Confluence                                           | 164±43                   | 41–281                           | 2.8±1.4        | 0.9–7.2                |
| Right Transverse Sinus                               | 78±38                    | 20–151                           | 1.1±0.3        | 0.5–2.4                |
| Left Transverse Sinus                                | 82±34                    | 24–163                           | 1.1±0.2        | 0.6–1.6                |
| Right Sigmoid Sinus–<br>Transverse Sinus<br>Junction | 112±43                   | 32–204                           | 1.7±0.6        | 0.8–3.4                |
| Left Sigmoid Sinus–<br>Transverse Sinus<br>Junction  | 115±38                   | 40–198                           | 1.6±0.4        | 0.9–2.9                |
| Right Sigmoid Sinus                                  | 57±28                    | 21–136                           | 1.0±0.2        | 0.6–1.5                |
| Left Sigmoid Sinus                                   | 66±30                    | 23–153                           | 1.0±0.2        | 0.5–1.8                |
| Right Jugular Vein Area                              | 79±30                    | 22–157                           | 1.2±0.3        | 0.7–1.9                |
| Left Jugular Vein Area                               | 92±39                    | 34–205                           | 1.3±0.3        | 0.8–2.3                |
| Posterior Foramen<br>Magnum                          | 231±71                   | 103–416                          | 2.7±1.2        | 0.8–6.2                |

**Supplementary Table 3. Signal Intensity and Thickness within divisions of the Dorsal Lymphatic System.**

|                                            | Signal Intensity (units) | Signal Intensity Min-Max (units) | Thickness (mm) | Thickness Min-Max (mm) |
|--------------------------------------------|--------------------------|----------------------------------|----------------|------------------------|
| Anterior Cranial Fossa Dura                | 245±39                   | 158–343                          | 1.4±0.4        | 0.7–2.7                |
| Optic Groove Dura                          | 277±53                   | 113–388                          | 2.1±0.8        | 1.0–4.5                |
| Diaphragma Sellae                          | 243±64                   | 136–420                          | 1.5±0.4        | 0.9–2.8                |
| Right Trigeminal Dura Orifice              | 256±68                   | 134–463                          | 2.2±0.6        | 1.3–4.5                |
| Left Trigeminal Dura Orifice               | 254±73                   | 120–442                          | 2.1±0.7        | 1.2–4.4                |
| Right Meckel's Cave Dura                   | 205±33                   | 146–319                          | 1.3±0.1        | 1.1–7.0                |
| Left Meckel's Cave Dura                    | 204±36                   | 137–365                          | 1.3±0.2        | 1.2–1.0                |
| Right Internal Acoustic Canal Orifice Dura | 301±60                   | 173–433                          | 2.6±0.8        | 1.4–5.5                |
| Left Internal Acoustic Canal Orifice Dura  | 313±68                   | 190–539                          | 2.5±0.7        | 1.4–4.4                |
| Right Jugular Foramen Dura                 | 256±65                   | 142–453                          | 2.3±0.7        | 1.1–3.8                |
| Left Jugular Foramen Dura                  | 243±61                   | 135–409                          | 2.2±0.8        | 1.1–5.1                |

**Supplementary Table 4. Signal Intensity and Thickness within divisions of the Ventral Lymphatic System.**



|                                               | Older | Younger | p      |
|-----------------------------------------------|-------|---------|--------|
| Right ICA-JV-CN IX-XII (%visible)             | 100   | 100     | 1      |
| Left ICA-JV-CN IX-XII (%visible)              | 100   | 100     | 1      |
| Right ICA-JV-CN IX-XII RLG LN (%visible)      | 86.2  | 100     | 0.014* |
| Left ICA-JV-CN IX-XII RLG LN (%visible)       | 93.1  | 100     | 0.125* |
| Right ICA-JV-CN IX-XII-vascular LN (%visible) | 96.6  | 100     | 0.358* |
| Left ICA-JV-CN IX-XII-vascular LN (%visible)  | 96.6  | 100     | 0.358* |

**Supplementary Table 5. Connections between anatomical structures and lymph nodes in the neck region.** ICA: internal carotid artery, JV:Jugular vein, CN: cranial nerve, RLG: retropharyngeal lymph node, LN: lymph node

\* Fisher test is used

|                                                    | Older           | Younger         | Test* | 95% CI         | p      |
|----------------------------------------------------|-----------------|-----------------|-------|----------------|--------|
| Sagittal anterior SI (mean [SD])                   | 137 (23)        | 130 (23)        | -1.39 | -18.1 - 3.2    | 0.168  |
| Sagittal anterior SI / muscle SI ratio (mean [SD]) | 1.8 (0.31)      | 1.7 (0.33)      | -1.22 | -0.24 - 0.06   | 0.23   |
| Sagittal anterior thickness (mean [SD])            | 2.4 (0.5)       | 2.1 (0.6)       | -2.55 | -0.58 - -0.07  | 0.013  |
| Sagittal middle SI (mean [SD])                     | 166 (21)        | 154 (23)        | -2.4  | -22.4 - -2.1   | 0.019  |
| Sagittal middle SI / muscle SI ratio (mean [SD])   | 2.2 (0.26)      | 2 (0.3)         | -2.36 | -0.28 - -0.024 | 0.021  |
| Sagittal middle thickness (mean [SD])              | 4.5 (1.2)       | 3.6 (0.8)       | -4.1  | -1.37 - -0.47  | <0.001 |
| Sagittal posterior (%visible)                      | 96.6            | 59.6            | NA    | NA             | <0.001 |
| Average sagittal SI (mean [SD])                    | 151.4<br>(19.9) | 141.5<br>(21.2) | -2.04 | -19.4 - -0.25  | 0.044  |
| Average sagittal SI / muscle SI ratio (mean [SD])  | 2 (0.26)        | 1.9 (0.28)      | -1.89 | -0.25 - 0.007  | 0.063  |
| Average sagittal thickness (mean [SD])             | 3.4 (0.67)      | 2.8 (0.55)      | -4.55 | -0.9 - -0.35   | <0.001 |
| Transverse sinus visible (%)                       | 82.8            | 50              | 8.46  | NA             | 0.004  |
| Sigmoid visible (%)                                | 89.7            | 53.8            | NA    | NA             | 0.001  |
| Jugular visible (%)                                | 69              | 17.3            | 21.62 | NA             | <0.001 |

|                                                |                 |                 |       |                |        |
|------------------------------------------------|-----------------|-----------------|-------|----------------|--------|
| Average dorsal SI (mean [SD])                  | 140.3<br>(21.1) | 130.4<br>(23.6) | -1.87 | -20.4 - 0.64   | 0.065  |
| Average dorsal SI / muscle ratio (mean [SD])   | 1.8 (0.2)       | 1.7 (0.3)       | -1.99 | -0.24 - 0.001  | 0.05   |
| Average ventral SI (mean [SD])                 | 247.4<br>(35.4) | 259.9<br>(32.6) | 1.6   | -3.03 - 28.03  | 0.11   |
| Average ventral SI / muscle ratio (mean [SD])  | 3.3 (0.4)       | 3.5 (0.4)       | 1.93  | -0.006 - 0.39  | 0.057  |
| Dorsal/ventral SI ratio (mean [SD])            | 0.57 (0.08)     | 0.5 (0.07)      | -3.97 | -0.11 - -0.035 | <0.001 |
| Average dorsal thickness (median [IQR])        | 2.6 (0.8)       | 2.1 (0.5)       | -4.39 | NA             | <0.001 |
| Average ventral thickness (median [IQR])       | 2 (0.5)         | 1.9 (0.5)       | -1.98 | NA             | 0.048  |
| Dorsal/ventral thickness ratio (median [IQR])  | 1.19 (0.34)     | 1.06 (0.33)     | -3.09 | NA             | 0.002  |
| Average dorsal SI/thickness ratio (mean [SD])  | 55.2 (9.3)      | 63.7 (10.3)     | 3.67  | 3.9 - 13.1     | <0.001 |
| Average ventral SI/thickness ratio (mean [SD]) | 119.3<br>(17.3) | 136.8<br>(22.7) | 3.60  | 7.8 - 27.2     | 0.001  |
| Average AVS SI (mean [SD])                     | 248 (42)        | 259 (34)        | 1.26  | -6.29 - 27.82  | 0.21   |
| Average AVS SI / muscle SI ratio (mean [SD])   | 3.27 (0.47)     | 3.46 (0.55)     | 1.58  | -0.05 - 0.43   | 0.119  |
| Average AVS thickness (mean [SD])              | 1.9 (0.3)       | 1.5 (0.3)       | -5.2  | -0.53 - -0.24  | <0.001 |

|                                                     |             |             |       |               |        |
|-----------------------------------------------------|-------------|-------------|-------|---------------|--------|
| Average PVS SI (mean [SD])                          | 258 (45)    | 277 (44)    | 1.88  | -1.18 - 39.6  | 0.064  |
| Average PVS SI / muscle SI ratio (mean [SD])        | 3.41 (0.55) | 3.69 (0.56) | 2.19  | 0.026 - 0.54  | 0.032  |
| Average PVS thickness (mean [SD])                   | 2.4 (0.5)   | 2.3 (0.5)   | -0.83 | -0.32 - 0.13  | 0.4    |
| Retropharyngeal LN SI (mean [SD])                   | 157 (24)    | 195 (28)    | 6.10  | 25.49 - 50.2  | <0.001 |
| Retropharyngeal LN SI / muscle SI ratio (mean [SD]) | 2.09 (0.34) | 2.61 (0.46) | 5.31  | 0.33 - 0.71   | <0.001 |
| Retropharyngeal LN short axis (mean [SD])           | 2.7 (1)     | 4.6 (1.5)   | 6.10  | 1.3 - 2.56    | <0.001 |
| Vascular LN SI (mean [SD])                          | 150 (35)    | 184 (29)    | 4.75  | 19.73 - 48.23 | <0.001 |
| Vascular LN SI / muscle SI ratio (mean [SD])        | 1.99 (0.45) | 2.47 (0.49) | 4.38  | 0.26 - 0.70   | <0.001 |
| Vascular LN short axis (mean [SD])                  | 5.9 (1.8)   | 7.6 (2.2)   | 3.56  | 0.76 - 2.70   | <0.001 |

**Supplementary Table 6. Comparison of older and younger subjects.** SI: Signal intensity, LN: lymph node, AVS: anterior ventral system, PVS: posterior ventral system.

\*Chi square, t, or Z values for categorical, skewly distributed continuous, or normally distributed continuous variables. All tests are two-sided.

NA: not available

|                                                | Males        | Females     | Test* | 95% CI       | p      |
|------------------------------------------------|--------------|-------------|-------|--------------|--------|
| Age (median [IQR])                             | 31 (37.8)    | 43 (38.5)   | -0.39 | -10.9 - 7.36 | 0.701  |
| Sagittal anterior SI (mean [SD])               | 141 (23)     | 125 (21)    | 3.42  | 6.95 - 26.34 | 0.001  |
| Sagittal anterior SI / WM SI ratio (mean [SD]) | 1.14 (0.18)  | 0.99 (0.15) | 3.91  | 0.07 - 0.22  | <0.001 |
| Sagittal anterior thickness (mean [SD])        | 2.3 (0.6)    | 2.1 (0.6)   | 2.0   | 0.001 - 0.50 | 0.049  |
| Sagittal middle SI (mean [SD])                 | 166 (18)     | 151 (24)    | 3.14  | 5.52 - 24.63 | 0.002  |
| Sagittal middle SI / WM SI ratio (mean [SD])   | 1.34 (0.14)  | 1.20 (0.17) | 3.87  | 0.07 - 0.21  | <0.001 |
| Sagittal middle thickness (mean [SD])          | 3.9 (0.9)    | 3.9 (1.2)   | 0.25  | -0.42 - 0.54 | 0.8    |
| Sagittal posterior (%visible)                  | 77.8)        | 68.9        | 0.8   | NA           | 0.371  |
| Average sagittal SI (mean [SD])                | 153.9 (18.7) | 138 (20.6)  | 3.59  | 7.06 - 24.66 | 0.001  |
| Average sagittal SI / WM SI ratio (mean [SD])  | 1.24 (0.14)  | 1.10 (0.14) | 4.49  | 0.08 - 0.21  | <0.001 |
| Average sagittal thickness (median [IQR])      | 3.08 (0.88)  | 2.9 (0.98)  | -1.33 | NA           | 0.185  |
| Transverse sinus visible (%)                   | 72.2         | 53.3        | 3.02  | NA           | 0.082  |
| Sigmoid visible (%)                            | 72.2         | 62.2        | 0.9   | NA           | 0.343  |

|                                                   |                 |                 |       |                |        |
|---------------------------------------------------|-----------------|-----------------|-------|----------------|--------|
| Jugular visible (%)                               | 50              | 24.4            | 5.68  | NA             | 0.017  |
| Average dorsal SI (mean [SD])                     | 145.4<br>(19.6) | 124.6<br>(21.7) | 4.45  | 11.47 - 30.07  | <0.001 |
| Average dorsal SI / WM SI ratio<br>(mean [SD])    | 1.17 (0.16)     | 0.99<br>(0.13)  | 5.87  | 0.12 - 0.25    | <0.001 |
| Average ventral SI (mean [SD])                    | 264 (29)        | 248.5<br>(36.4) | 2.08  | 0.67 - 30.31   | 0.04   |
| Average ventral SI / WM SI ratio<br>(mean [SD])   | 2.13 (0.25)     | 1.97<br>(0.24)  | 2.83  | 0.05 - 0.27    | 0.006  |
| Dorsal/ventral SI ratio (mean<br>[SD])            | 0.56 (0.08)     | 0.5 (0.08)      | 2.86  | 0.016 - 0.087  | 0.005  |
| Average dorsal thickness<br>(median [IQR])        | 2.38 (0.8)      | 2.05 (0.6)      | -3.18 | NA             | 0.001  |
| Average ventral thickness<br>(median [IQR])       | 2.14 (0.52)     | 1.83<br>(0.35)  | -3.22 | NA             | 0.001  |
| Dorsal/ventral thickness ratio<br>(median [IQR])  | 1.17 (0.4)      | 1.09<br>(0.19)  | -0.69 | NA             | 0.492  |
| Average dorsal SI/thickness<br>ratio (mean [SD])  | 60.9 (10.8)     | 60.4<br>(10.8)  | 0.19  | -4.37 - 5.29   | 0.85   |
| Average ventral SI/thickness<br>ratio (mean [SD]) | 126.4<br>(23.5) | 133.9<br>(21.3) | -1.49 | -17.38 - 2.47  | 0.139  |
| Average AVS SI (mean [SD])                        | 257 (31)        | 254 (42)        | 0.36  | -13.61 - 19.59 | 0.721  |
| Average AVS SI / WM SI ratio<br>(mean [SD])       | 2.07 (0.25)     | 2.01<br>(0.27)  | 0.96  | -0.058 - 0.17  | 0.328  |

|                                                 |             |             |      |                |       |
|-------------------------------------------------|-------------|-------------|------|----------------|-------|
| Average AVS thickness (mean [SD])               | 1.8 (0.4)   | 1.6 (0.4)   | 2.21 | 0.18 - 0.34    | 0.03  |
| Average PVS SI (mean [SD])                      | 282 (41)    | 261 (46)    | 2.08 | 0.9 - 40.08    | 0.041 |
| Average PVS SI / WM SI ratio (mean [SD])        | 2.28 (0.35) | 2.08 (0.33) | 2.6  | 0.05 - 0.35    | 0.011 |
| Average PVS thickness (mean [SD])               | 2.5 (0.6)   | 2.2 (0.3)   | 3.21 | 0.13 - 0.56    | 0.002 |
| Retropharyngeal LN SI (mean [SD])               | 184 (35)    | 180 (30)    | 0.65 | -9.74 - 19.09  | 0.521 |
| Retropharyngeal LN SI / WM SI ratio (mean [SD]) | 1.48 (0.27) | 1.43 (0.23) | 0.96 | -0.06 - 0.16   | 0.342 |
| Retropharyngeal LN short axis (mean [SD])       | 4 (1.8)     | 3.9 (1.5)   | 0.27 | -0.64 - 0.84   | 0.786 |
| Vascular LN SI (mean [SD])                      | 173 (39)    | 172 (32)    | 0.14 | -14.46 - 16.71 | 0.886 |
| Vascular LN SI / WM SI ratio (mean [SD])        | 1.39 (0.31) | 1.37 (0.26) | 0.38 | -0.1 - 0.15    | 0.704 |
| Vascular LN short axis (mean [SD])              | 7.1 (2.4)   | 6.9 (2.2)   | 0.23 | -0.89 - 1.12   | 0.820 |

**Supplementary Table 7. Comparison of male and female subjects.** SI: Signal intensity, WM: central white matter, AVS: anterior ventral system, PVS: posterior ventral system, LN: lymph node.

\*Chi square, t, or Z values for categorical, skewedly distributed continuous, or normally distributed continuous variables. All tests are two-sided. NA: not available

|                                     | Older subjects  | Younger subjects | t*    | 95% CI        | p     |
|-------------------------------------|-----------------|------------------|-------|---------------|-------|
| Right superficial temporalis muscle | 76.3 (SD 8.5)   | 75.8 (SD 9.8)    | -0.27 | -4.9 - 3.72   | 0.78  |
| Left superficial temporalis muscle  | 75.6 (SD 8.3)   | 75.7 (SD 9.6)    | 0.07  | -4.09 - 4.37  | 0.95  |
| Right insula                        | 181.6 (SD 18.9) | 191.8 (SD 20.6)  | 2.20  | 0.98 - 19.43  | 0.031 |
| Left insula                         | 180.9 (SD 19.2) | 190.2 (SD 19.6)  | 2.07  | 0.36 - 18.30  | 0.042 |
| Right nucleus caudatus              | 155.8 (SD 15.3) | 168.8 (SD 17.4)  | 3.35  | 5.27 - 20.68  | 0.001 |
| Left nucleus caudatus               | 156 (SD 15.4)   | 168 (SD 17.8)    | 3.04  | 4.14 - 19.79  | 0.003 |
| Right cerebellum cortex             | 192.7 (SD 19.1) | 200.6 (SD 21.1)  | 1.67  | -1.52 - 17.33 | 0.10  |
| Left cerebellum cortex              | 192.7 (SD 17.5) | 201.5 (SD 20.7)  | 1.93  | -0.21 - 17.91 | 0.06  |
| Right cerebellum white matter       | 145.6 (SD 13.2) | 147 (SD 16.5)    | 0.41  | -5.62 - 8.56  | 0.68  |
| Left cerebellum white matter        | 145.1 (SD 13.6) | 147.8 (SD 15.9)  | 0.77  | -4.3 - 9.67   | 0.45  |
| Right frontal cortex                | 130.3 (SD 13.5) | 132.7 (SD 13.1)  | 0.79  | -3.69 - 8.56  | 0.43  |
| Left frontal cortex                 | 130.9 (SD 13.4) | 132.1 (SD 12.9)  | 0.39  | -5 - 7.4      | 0.70  |
| Right central white matter          | 125.3 (SD 11.9) | 125.6 (SD 12.7)  | 0.086 | -5.49 - 5.98  | 0.932 |
| Left central white matter           | 125.3 (SD 10.8) | 125.3 (SD 12.6)  | 0.07  | -5.5 - 5.55   | 0.994 |

**Supplementary Table 8. Signal intensity of reference areas and their association with age.**

\*All tests are two-sided



|                                     | Male subjects   | Female subjects | t*    | 95% CI        | p     |
|-------------------------------------|-----------------|-----------------|-------|---------------|-------|
| Right superficial temporalis muscle | 78.4 (SD 7.6)   | 74 (SD 10.1)    | 2.17  | 0.37 - 8.46   | 0.033 |
| Left superficial temporalis muscle  | 78.3 (SD 7.3)   | 73.5 (SD 9.9)   | 2.4   | 0.8 - 8.69    | 0.019 |
| Right insula                        | 192.8 (SD 21.0) | 184.5 (SD 19.5) | 1.85  | -0.64 - 17.32 | 0.068 |
| Left insula                         | 191.4 (SD 19.5) | 183.2 (SD 19.6) | 1.87  | -0.53 - 16.86 | 0.065 |
| Right nucleus caudatus              | 167.7 (SD 16.8) | 161.2 (SD 18.1) | 1.65  | -1.33 - 14.29 | 0.10  |
| Left nucleus caudatus               | 167.4 (SD 16.4) | 160.7 (SD 18.5) | 1.68  | -1.21 - 14.47 | 0.10  |
| Right cerebellum cortex             | 205.1 (SD 18.3) | 191.9 (SD 20.7) | 2.98  | 4.35 - 21.9   | 0.004 |
| Left cerebellum cortex              | 205.4 (SD 18.3) | 192.7 (SD 19.7) | 2.97  | 4.2 - 21.17   | 0.004 |
| Right cerebellum white matter       | 149.6 (SD 16.7) | 144 (SD 13.8)   | 1.68  | -1.07 - 12.39 | 0.10  |
| Left cerebellum white matter        | 149.6 (SD 15.8) | 144.6 (SD 14.3) | 1.47  | -1.76 - 11.58 | 0.15  |
| Right frontal cortex                | 132.5 (SD 12.8) | 131.3 (SD 13.7) | 0.4   | -4.74 - 7.11  | 0.69  |
| Left frontal cortex                 | 132.3 (SD 12.4) | 131.2 (SD 14.2) | 0.34  | -4.95 - 7.02  | 0.73  |
| Right central white matter          | 124.6 (SD 9.9)  | 126.2 (SD 14.1) | -0.58 | -7.12 - 3.93  | 0.55  |
| Left central white matter           | 124.2 (SD 9.9)  | 126.3 (SD 13.3) | -0.8  | -7.46 - 3.17  | 0.42  |

**Supplementary Table 9. Signal intensity of reference areas and their association with sex.**

\*All tests are two-sided.
